# Supplementary material for: Morphology-controlled fabrication of hierarchical mesoporous NiCo2O4 micro-/nanostructures and their intriguing application in electrochemical capacitors
Source: Royal Society of Chemistry journal article supplement (doi:10.1039/c3ra44546a), 2013-01-01
Supplement: c3ra44546a.pdf [file c3ra44546a.pdf]

## Electronic Supplementary Information

---

### **Morphology-controlled fabrication of hierarchical mesoporous NiCo<sub>2</sub>O<sub>4</sub> micro-/nanostructures and their intriguing application in electrochemical capacitors**

*Le Yu,<sup>b, c</sup> Haobin Wu,<sup>b</sup> Tian Wu,<sup>\*a</sup> and Changzhou Yuan <sup>\*b, d</sup>*

<sup>a</sup> College of Chemistry and Life Sciences, Hubei University of Education, Wuhan 430205, (PR China)

<sup>b</sup> School of Chemical and Biomedical Engineering, Nanyang Technological University, 62 Nanyang Drive, Singapore, 637459, (Singapore)

<sup>c</sup> Nanyang Environment and Water Research Institute, Nanyang Technological University, 1 Cleantech Loop, Singapore, 637141, (Singapore)

<sup>d</sup> School of Materials Science & Engineering, Anhui University of Technology, Ma'anshan, 243002, (PR China)

Email: [twu@whu.edu.cn](mailto:twu@whu.edu.cn) (T. Wu), [ayuan cz@163.com](mailto:ayuan cz@163.com) (C. Yuan)

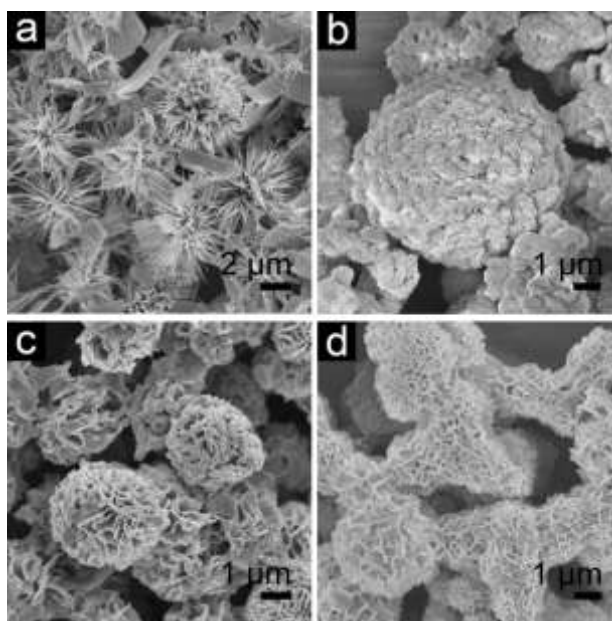

**Fig. S1** FESEM images of the Co-based precursor obtained using the mixed solvent of EtOH/H<sub>2</sub>O (30mL/30mL) (a), and EtOH as the solvent (b). Ni-based precursor structures obtained using the mixed solvent of EtOH/H<sub>2</sub>O (30mL/30mL) (c), and EtOH as the solvent (d).

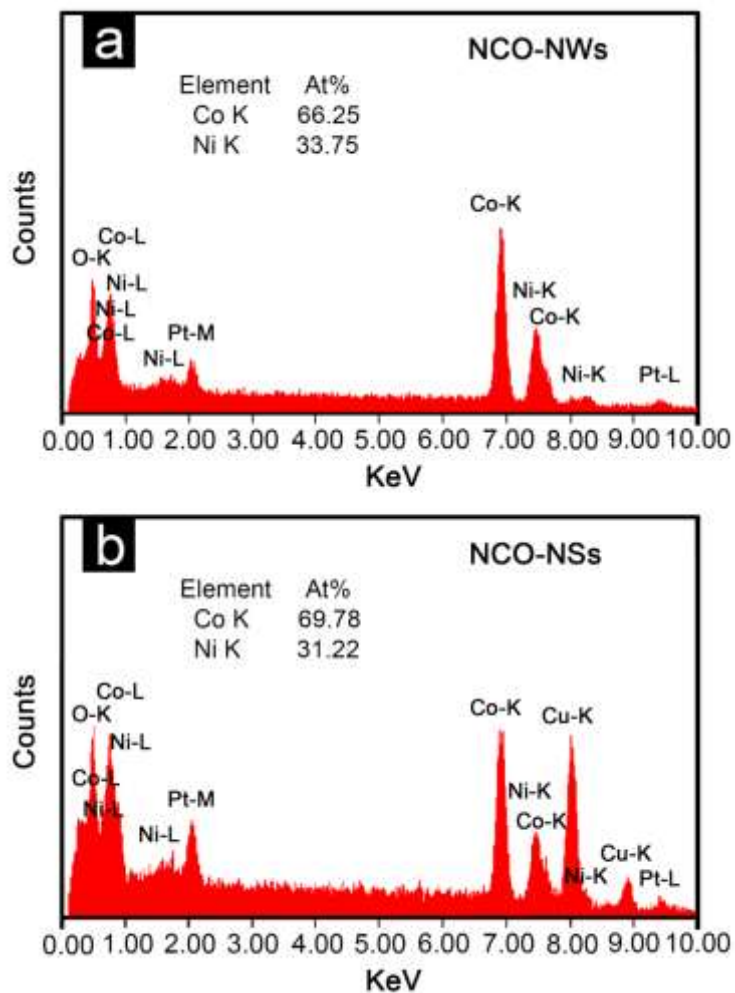

**Fig. S2** EDX spectra of (a) the NCO-NWs and (b) the NCO-NSs.

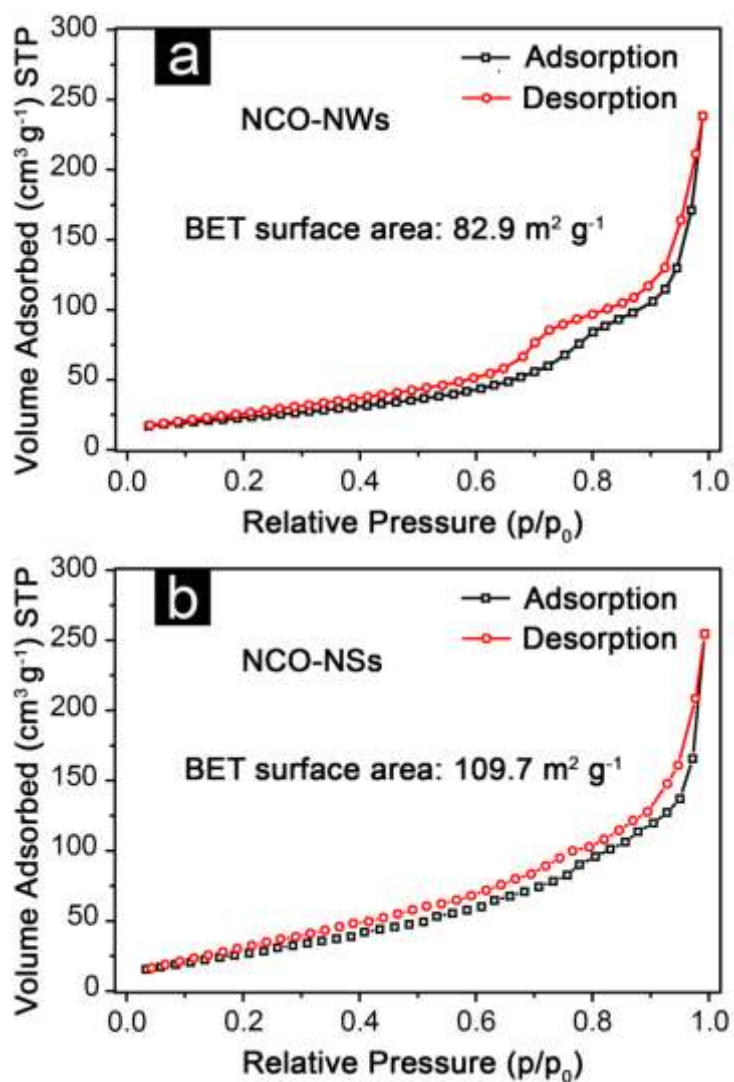

**Fig. S3** N<sub>2</sub> adsorption-desorption isotherms at 77 K of (a) the NCO-NWs and (b) the NCO-NSs.
